# Supplementary material
Source: Springer Nature journal article supplement (https://www.springermedizin.de/resource/supplementary/13075_2009_2761_MOESM6_ESM.pdf/9692826)

**A**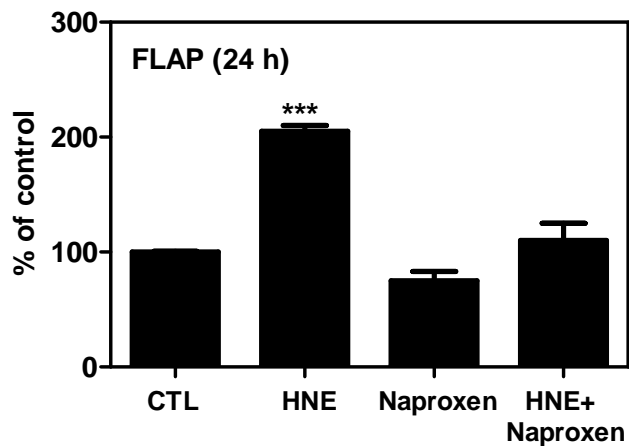**B**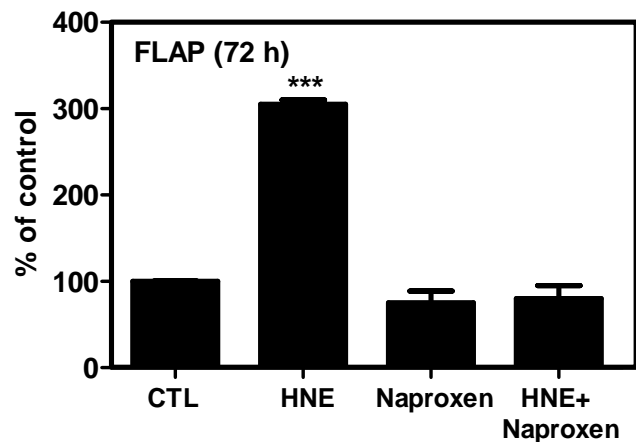**C**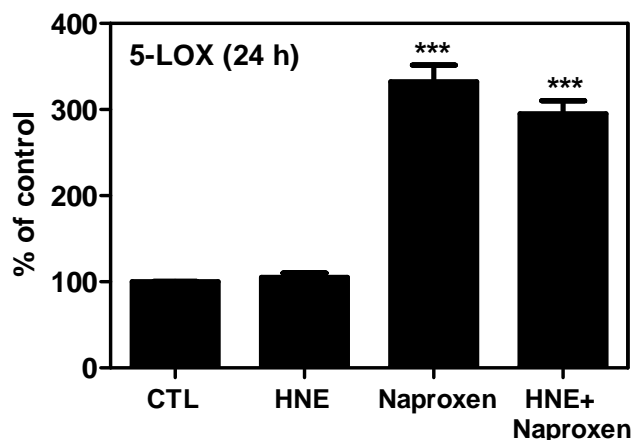**D**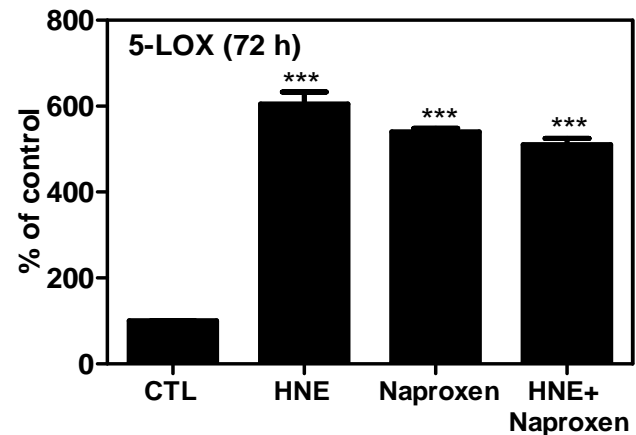**E**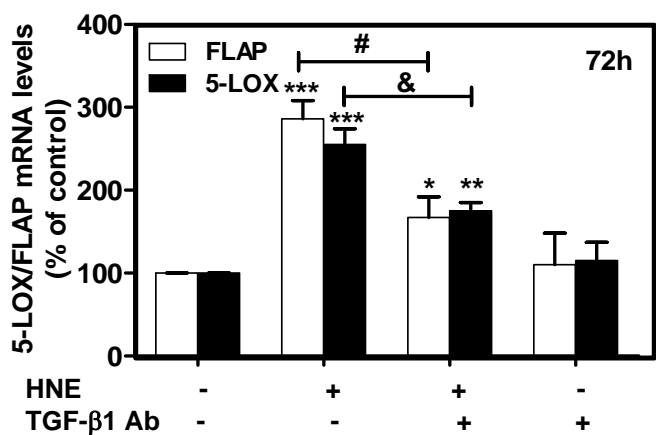**F**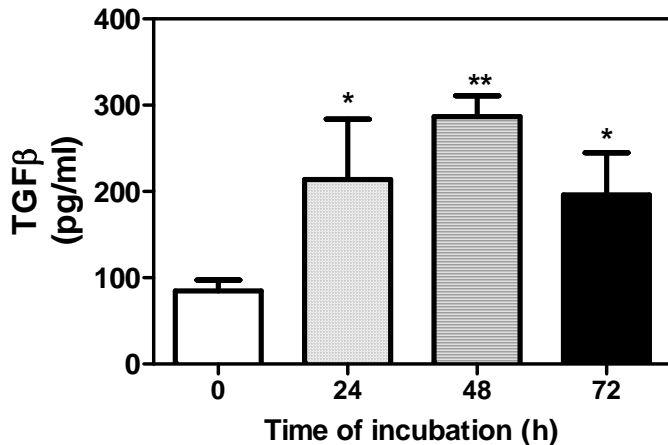

Supplement: MOESM6 [file 9692826]
